# Supplementary material
Source: publisher figshare collection journal article supplement (https://acs.figshare.com/ndownloader/files/23463134)
Supplement: Supplementary file 1 [file 23463134]

## SUPPORTING INFORMATION

### **Title: Processed bamboo as a novel formaldehyde-free high-performance furniture bio-composite**

Authors: Shengbo Ge<sup>a,b#</sup>, Nyuk Ling Ma<sup>c#</sup>, Shuaicheng Jiang<sup>b#</sup>, Yong Sik Ok<sup>d,#</sup>, Su Shiung Lam<sup>e,a\*</sup>, Cheng Li<sup>a</sup>, Sheldon Qiang Shi<sup>f</sup>, Xu Nie<sup>g</sup>, Ying Qiu<sup>g</sup>, Dongli Li<sup>b</sup>, Qingding Wu<sup>b</sup>, Daniel C.W. Tsang<sup>h</sup>, Wanxi Peng<sup>a,b\*</sup>, Christian Sonne<sup>i,a\*</sup>

Corresponding author: [cs@bios.au.dk](mailto:cs@bios.au.dk)

#### **This includes:**

Extended Materials and Methods.

Figures S1-S7.

Tables S1-S4.

## 14 **Extended Materials and Methods**

### 15 *FT-IR analysis*

16 The FT-IR spectra of the samples were obtained by a FT-IR spectrophotometer (IR100) using  
17 KBr discs containing 1.00% finely ground sample. This analysis was used to explain the changes in  
18 molecular structure and internal functional groups during the conversion of the natural bamboo into  
19 bio-composite. The FT-IR spectra of the samples were obtained on an FT-IR spectrophotometer  
20 (IR100) using KBr discs containing 1.00% finely ground sample. The samples were prepared by  
21 mixing with potassium bromide (ratio 1 : 7) using pestle and mortar, and then subjected to FTIR  
22 analysis at spectra ranging from 400 to 4000  $\text{cm}^{-1}$ .

### 24 *TGA analysis*

25 TGA was performed using a TG20 Thermal Gravimetric Analyzer (209-F1 TG, Netzsch,  
26 Germany) to investigate the proximate content (e.g., moisture, volatile matter), thermal stability,  
27 reaction kinetics, and stages of decomposition occurred during conversion of the natural bamboo into  
28 a bio-composite. TGA was performed by heating 10 mg of samples at a heating rate of 20  $^{\circ}\text{C}/\text{min}$   
29 from room temperature to 750  $^{\circ}\text{C}$  with nitrogen gas ( $\text{N}_2$ ) as carrier gas at a flow rate of 40  $\text{ml}/\text{min}$ .

### 31 *Cone calorimeter analysis*

32 Cone Calorimetry was performed according to the ISO 5660-1 standard method. The heat released  
33 was measured using a dual cone calorimeter from Fire Testing Technology Ltd.. The setup,  
34 calibration, and measurements were in accordance with the ISO 5660-1 standard method [15].  
35 Samples were mounted horizontally by using a specimen holder with edge frame. The bottom of the  
36 holder was lined with a ceramic fiber blanket. The bottom and sides of each sample were wrapped

with a 0.02-mm-thick aluminum foil. The heat release calculations were based on the measurement of oxygen, carbon monoxide, and carbon dioxide concentrations in the dried exhaust gas. Duplicate tests were conducted at heat fluxes of 30 and 50 kW/m<sup>2</sup>. Samples were prepared by cutting a bamboo bio-composite (70 mm thick) into 50 mm × 50 mm square pieces.

#### *XRD analysis*

X-ray diffractograms (XRD) are used to measure and analyze the cellulose crystallinity of the bamboo fiber and bamboo bio-composite, and the results are presented in Fig. S-2 [16, 17].  $I_{am}$  is the diffracted intensity of the peak detected at  $2\theta = 16.0^\circ$  in the amorphous region, and  $I_{002}$  is the intensity of the peak detected at  $2\theta = 22.0^\circ$  in the crystal region. Cr is the relative crystallinity and can be determined from  $Cr = (I_{002} - I_{am})/I_{002} \times 100\%$ . The X-ray diffraction patterns of samples were observed on a XD-2 diffractometer (General Analysis of Beijing General Instrument Co., Ltd., Beijing, P.R. China) with Cu-K $\alpha$  radiation ( $\lambda = 1.5406 \text{ \AA}$ ) to investigate the microstructure of the sample and determine the crystallinity that influences the properties of the sample. The X-ray tube used was a Cu tube with 36 kV of pipe potential and 20 mA of pipe current, and  $2\theta/\theta$  continuous scanning was used as the method for measurement. A graphite crystal monochromator was used with the slit device set at  $DS = 1^\circ$ ,  $SS = 1^\circ$ ,  $RS = 0.3 \text{ mm}$ . The rotary half-cone angle  $2\theta$  was from 5 to  $42^\circ$  with  $2^\circ/\text{min}$  of scanning velocity and 0.01 of scan step angle.

Cellulose crystallinity was calculated according to equation (1) as follows:

$$Cr = (I_{002} - I_{am})/I_{002} \times 100\%, (1)$$

where Cr is the relative percentage of crystallinity,  $I_{002}$  is the intensity of the peak at 002 of the crystal region, and  $I_{am}$  is the diffracted intensity of the peak at  $2\theta = 18^\circ$  in the amorphous region.

60 *SEM analysis*

61 The scanning electron microscope is a new type of electronic optical instrument. It has features  
62 such as simple sample preparation, wide adjustable zoom range, high image resolution, and large  
63 depth of field [18]. For decades, SEM has been widely used in the fields of biology, medicine,  
64 metallurgy, and other disciplines, which has promoted the development of various related disciplines  
65 and has made great contributions to the analysis of the structure and morphology of materials in  
66 particular [19,20]. A scanning electron microscope (Hitachi SU6600 microscope) was used to  
67 determine the surface morphology of the samples at 10 kV of accelerating voltage. This allowed the  
68 investigation of the microstructure, pore size, grain boundary, and degree of agglomeration of the  
69 samples. The sample's surface was coated in a vacuum evaporator with a thin film of Au and then  
70 placed in the sample SEM chamber for analysis.

71

72 *Nanoindentation tests*

73 Nanoindentation possesses high resolution and depth sensing ability. It has become an important  
74 tool in measurements of nanomechanical properties for small scale materials [21,22].  
75 Nanoindentation is widely used to measure micromechanical properties of materials [23]. Owing to  
76 the small sample volume under nanoindentation, the test can be highly localized to a specific  
77 microstructural feature [24]. Nanoindentation tests were performed on a Hysitron TI-950  
78 TriboIndenter to determine the hardness of the samples. This testing also includes the Young's  
79 modulus test of the samples, which can be used to investigate the contact stiffness, creep, elastic work,  
80 plastic work, fracture toughness, stress-strain curve, fatigue, storage modulus, and loss modulus. A  
81 nano-DMA transducer with a Berkovich probe and a trapezoidal load function was used for standard  
82 quasistatic indentation testing. A peak load of 1000  $\mu\text{N}$  was used, and the test results were calculated  
83 by the curve of force and indentation depth.

84

85 *Micro CT analysis*

86       The microstructures of the samples were analyzed using a SkyScan 1172 X-ray micro-computed  
87 tomography (micro-CT) (Bruker Corp., USA). It is a device that uses X-ray to scan the sample and  
88 then convert the signal into tomographic images that can clearly demonstrate the differences in the  
89 internal structure of the material. A source voltage of 60 kV and current of 167  $\mu$ A were selected to  
90 obtain the optimum attenuation contrast. A set of 1202 projections was obtained without filter at an  
91 angular step size of 0.3° and a 2 K binning mode (with a resolution of 2000  $\times$  1336 pixels). The  
92 corresponding spatial resolution of the X-ray radiography was about 8.49  $\mu$ m/pixel. NRExon software  
93 was employed to perform the reconstruction of the 3D object, and Data Viewer and CTvox were used  
94 for data analysis and visualization.

95       Although it cannot provide all the data of a standard analysis, micro-CT has substantial potential  
96 advantages in trying to determine volume ratio of fibers and volume ratio of interfaces in 3D [25,26].  
97 Micro-CT has been shown to provide fast and nondestructive characterization and measurement of  
98 the 3D properties of a scaffold [27,28] or tissue-engineered construct [29,30].

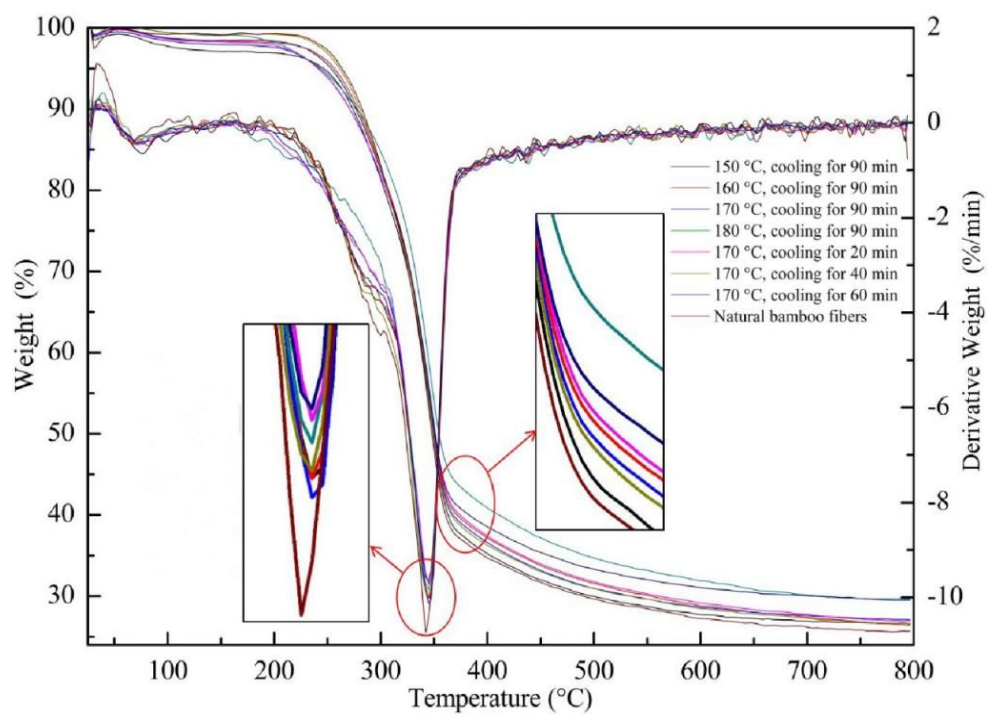

**Figure S1.** TGA/DTG curves of natural bamboo fiber and bamboo bio-composite.

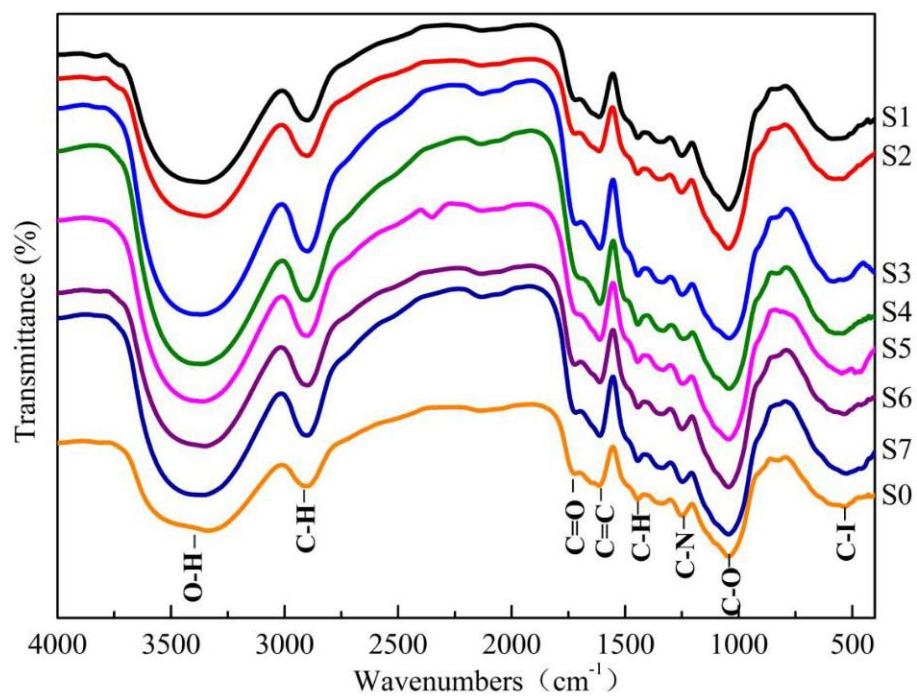

**Figure S2.** Infrared spectrum of natural bamboo fiber and bamboo bio-composite.

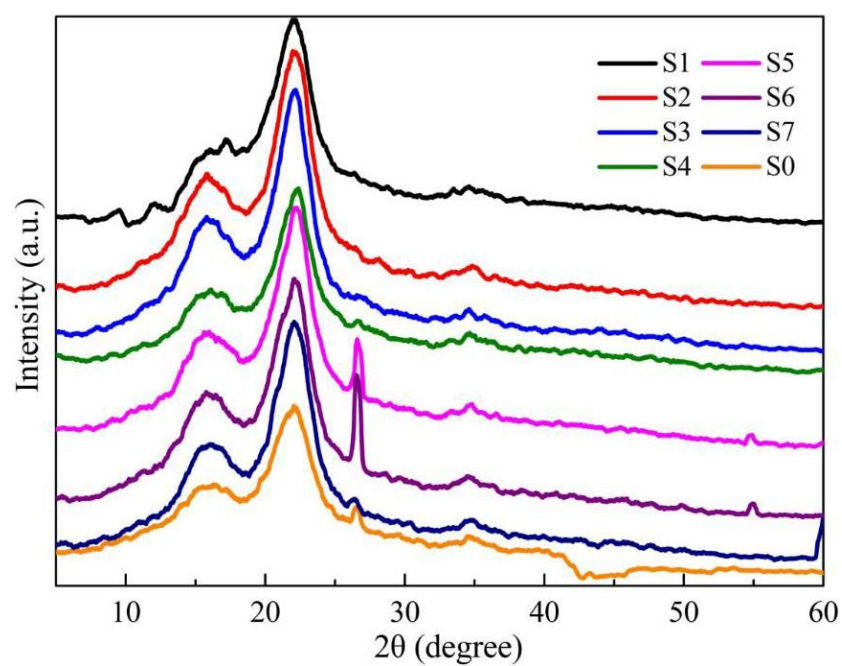

**Figure S3.** XRD curve of natural bamboo fiber and bamboo bio-composite.



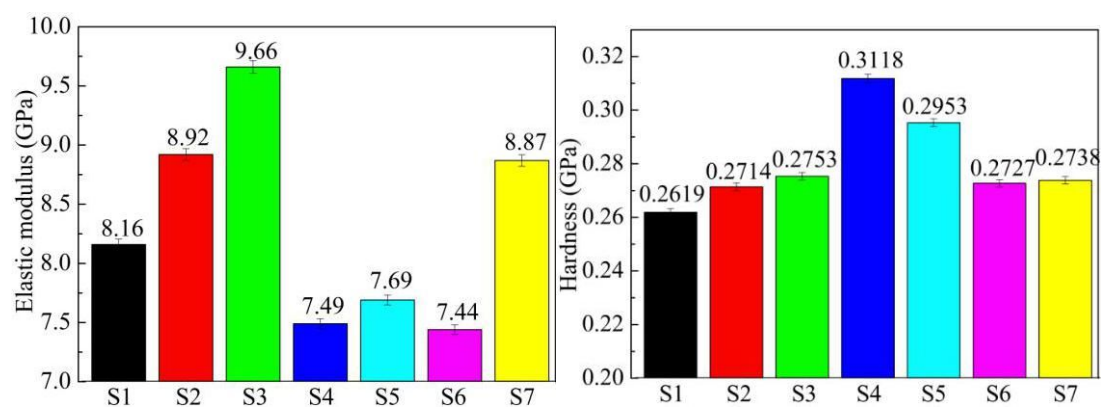

**Figure S4.** The elastic modulus and hardness of bamboo bio-composite.

108

109

110

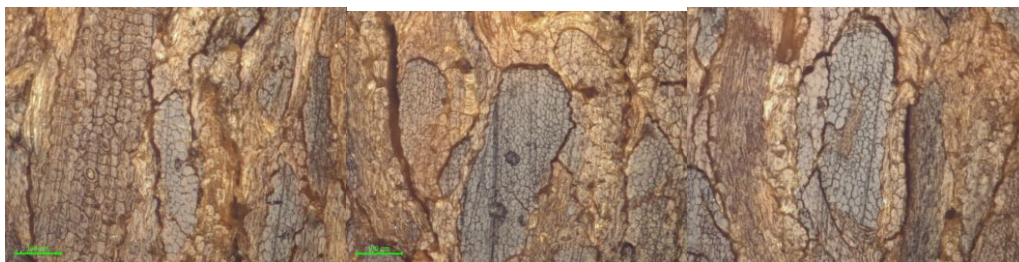

s1

111

112

113

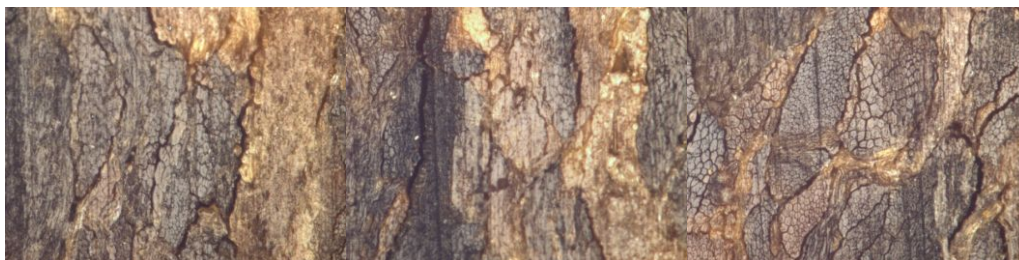

s2

114

115

116

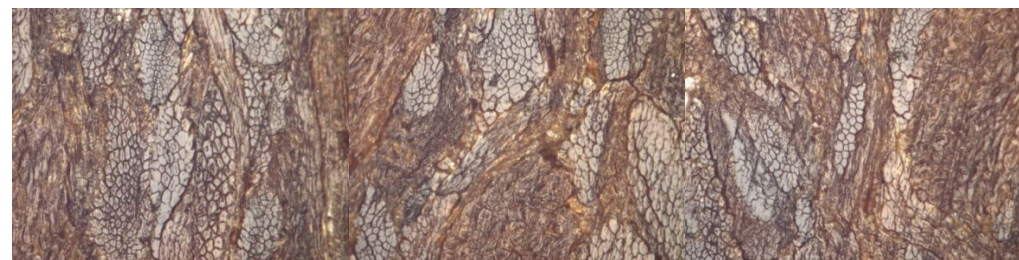

s3

117

118

119

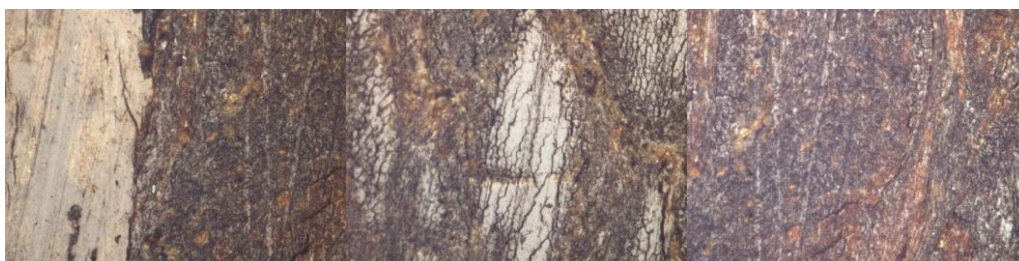

s4

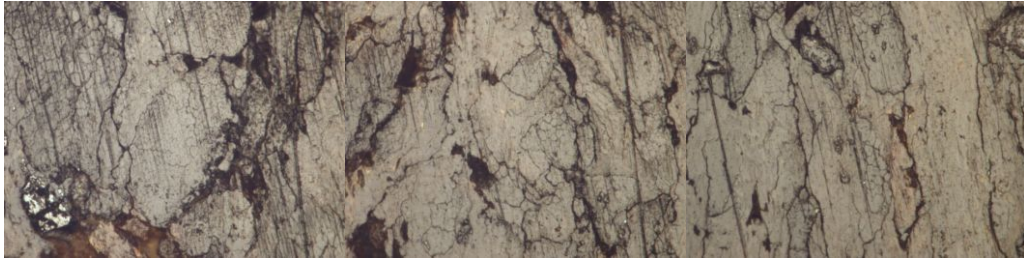

s5

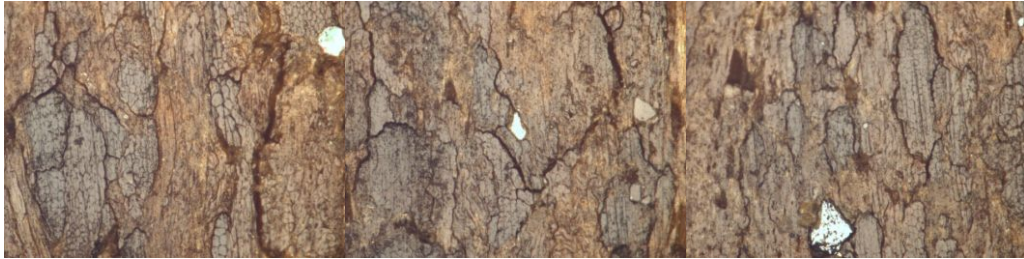

s6

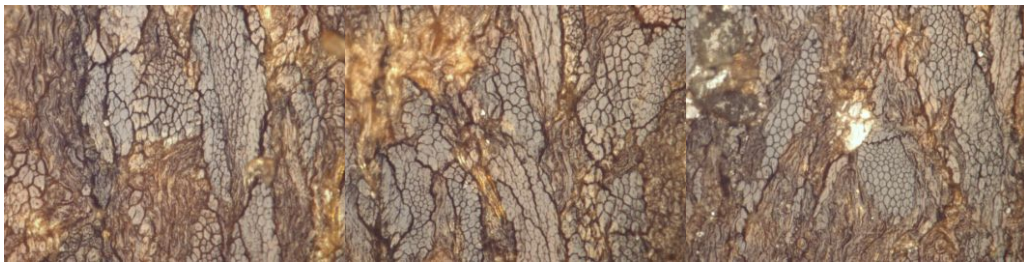

s7

**Figure S5.** Light microscopic photograph of bamboo bio-composite (S1-S7) by nanoindentation.



129

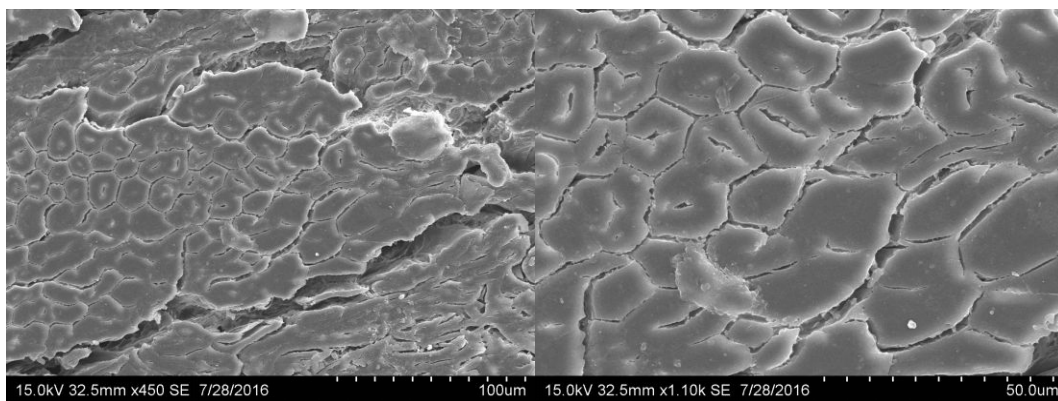

130

s1

131

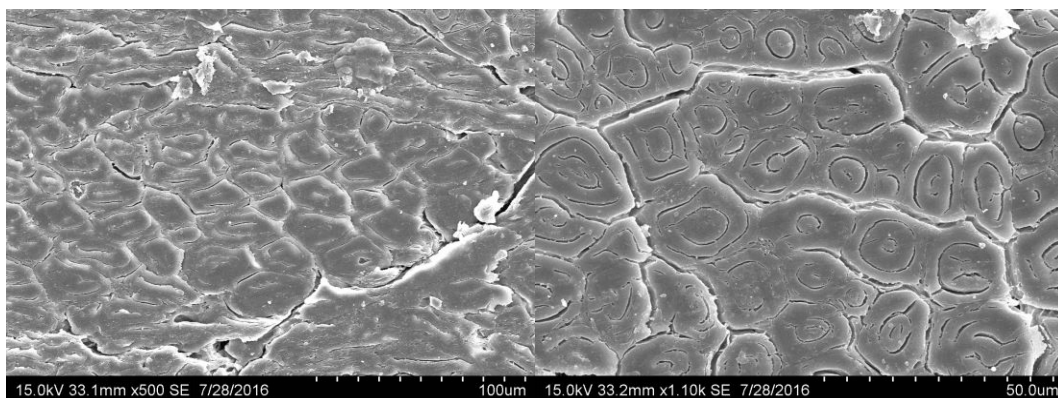

132

s2

133

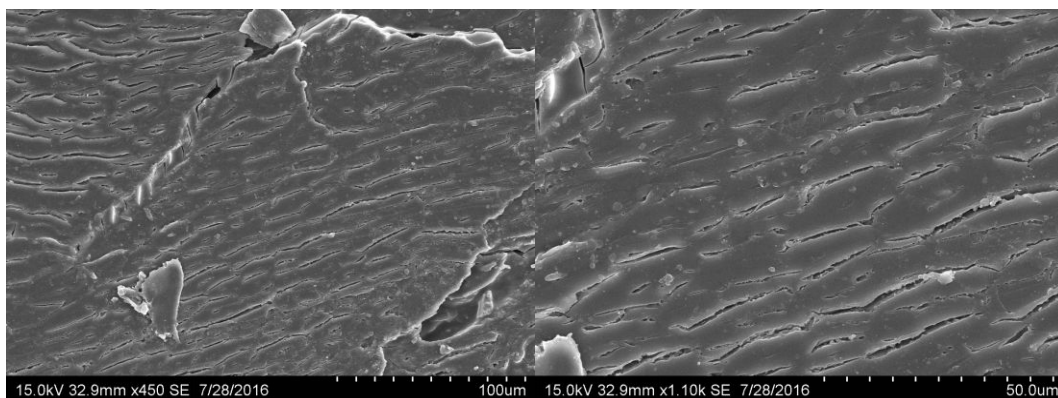

134

s3

135

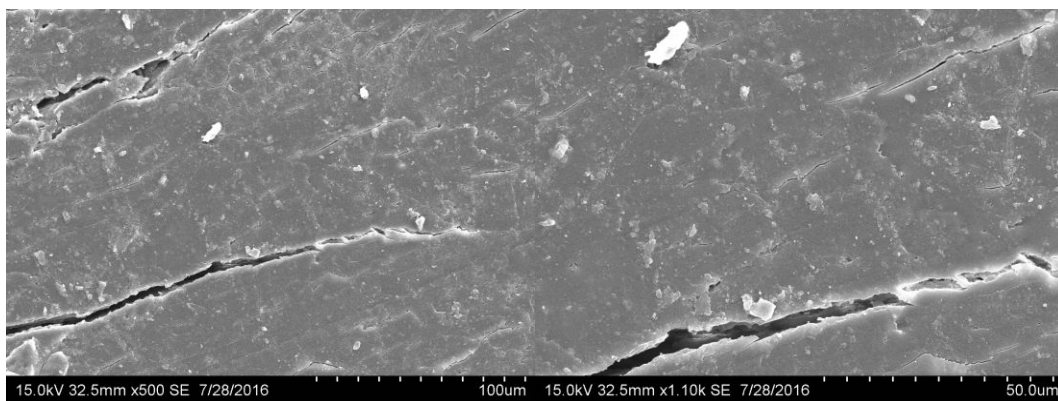

136

s4

137

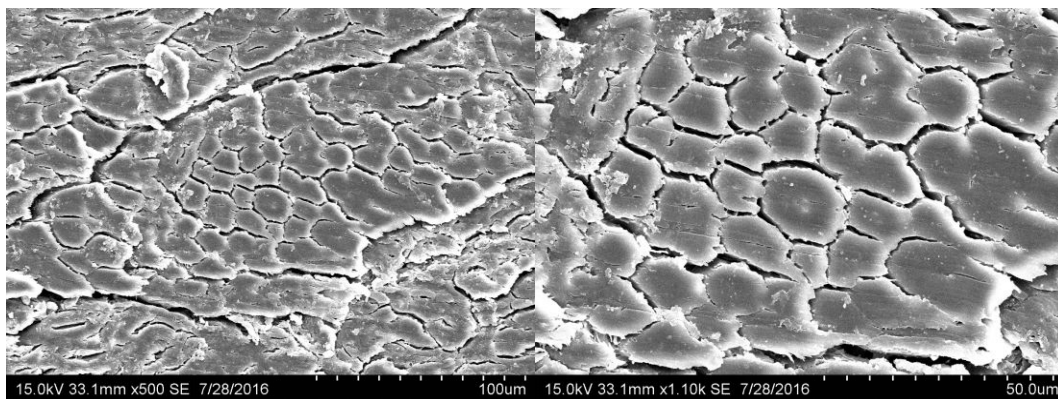

138

s5

139

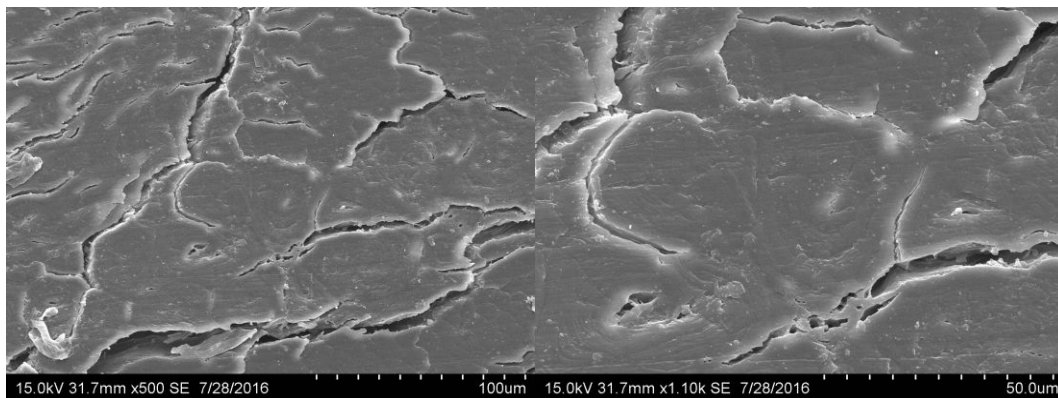

140

s6

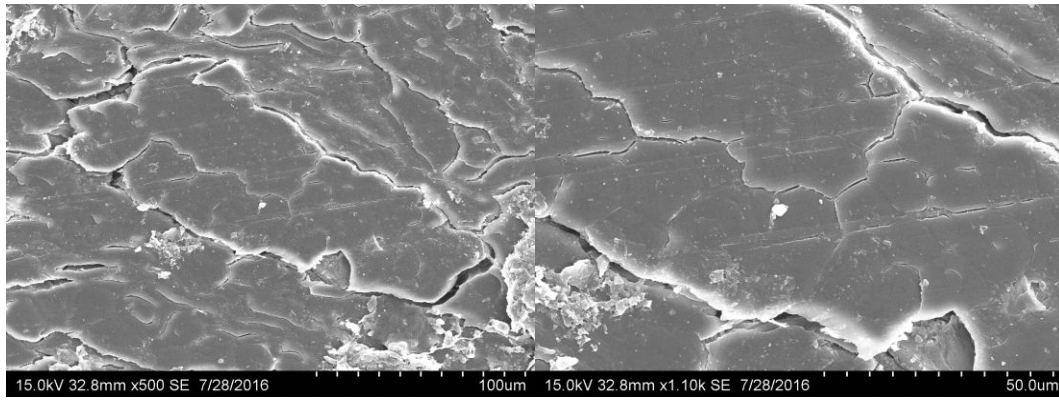

s7

**Figure S6.** Photograph of bamboo bio-composite surface (S1-S7) by SEM.

144

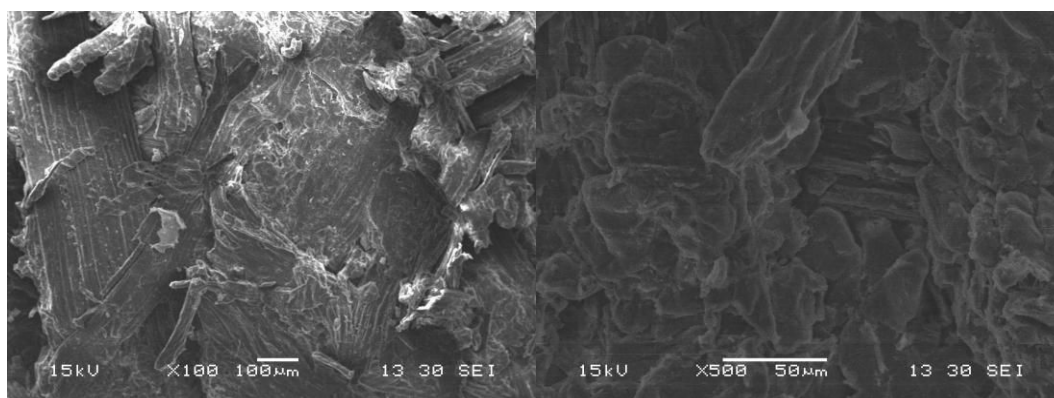

145

s1

146

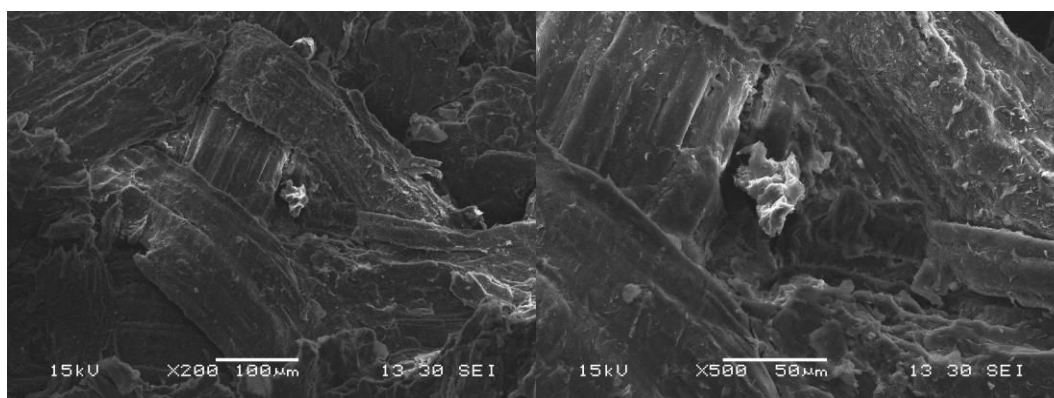

147

s2

148

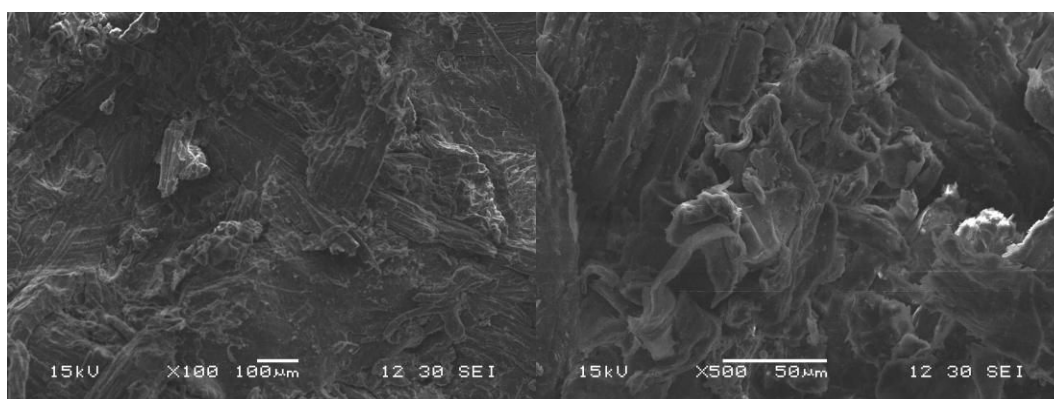

149

s3

150

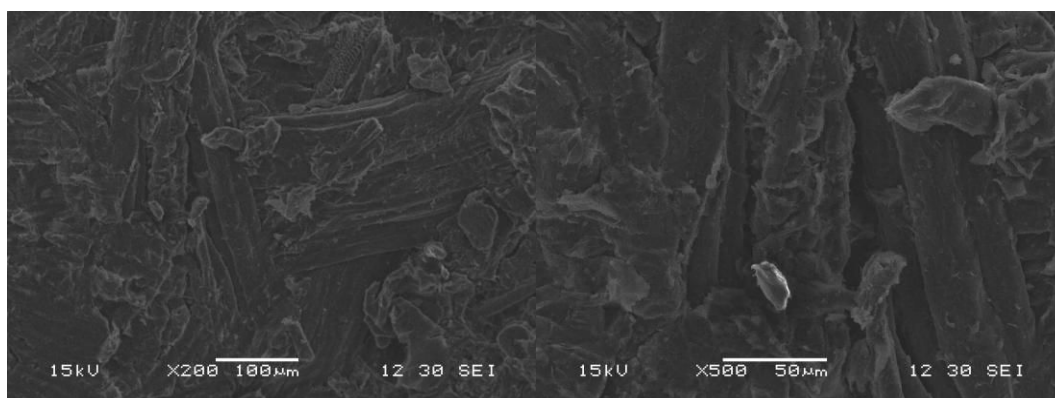

151

s4

152

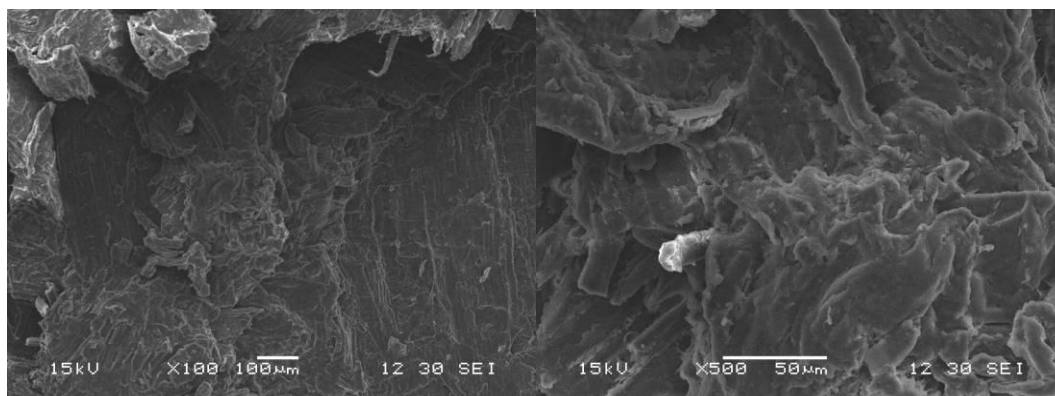

153

s5

154

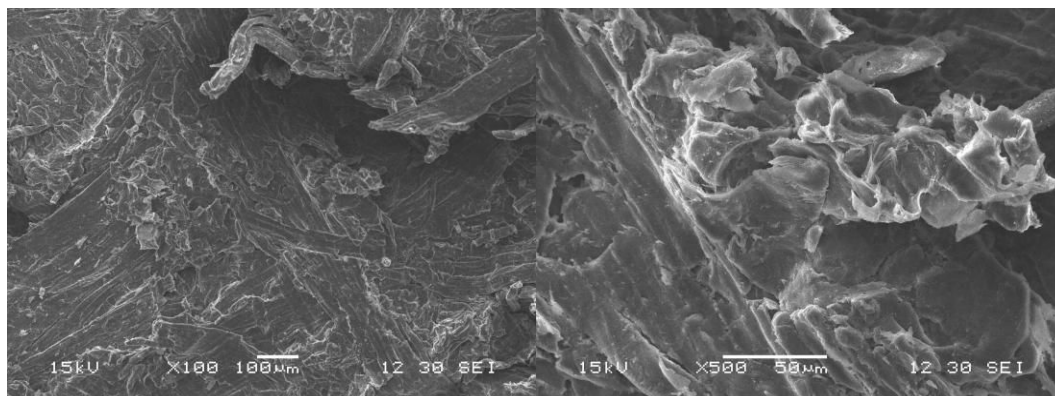

155

s6



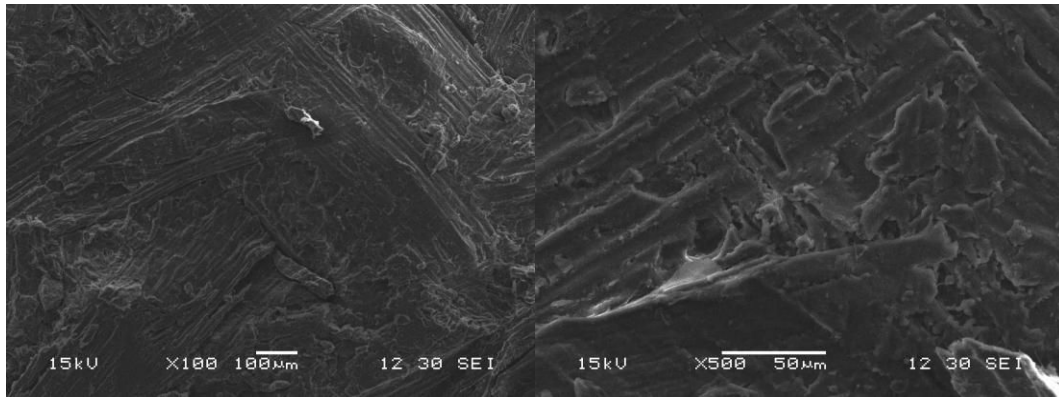

156

157

s7

158

**Figure S7.** Photograph of bamboo bio-composite (S1-S7) section by SEM.

159 **Table S1.** High thermal stability data of natural bamboo fiber and bamboo bio-composite.

| No. | PHRR<br>(kW·m <sup>-2</sup> ) | THR<br>(MJ·m <sup>-2</sup> ) | PSPR<br>(m <sup>2</sup> ·s <sup>-1</sup> ) | TSP<br>(m <sup>2</sup> ) | CO<br>(g·s <sup>-1</sup> ) | CO <sub>2</sub><br>(g·s <sup>-1</sup> ) |
|-----|-------------------------------|------------------------------|--------------------------------------------|--------------------------|----------------------------|-----------------------------------------|
| S1  | 117.92                        | 29.31                        | 0.023                                      | 0.836                    | 0.0020                     | 0.074                                   |
| S2  | 133.22                        | 27.03                        | 0.035                                      | 1.824                    | 0.0038                     | 0.084                                   |
| S3  | 167.25                        | 35.24                        | 0.015                                      | 2.250                    | 0.0028                     | 0.108                                   |
| S4  | 156.49                        | 35.80                        | 0.013                                      | 1.302                    | 0.0026                     | 0.103                                   |
| S5  | 164.37                        | 32.47                        | 0.023                                      | 1.043                    | 0.0037                     | 0.099                                   |
| S6  | 136.43                        | 25.50                        | 0.023                                      | 0.998                    | 0.0036                     | 0.090                                   |
| S7  | 139.23                        | 27.53                        | 0.027                                      | 1.746                    | 0.0039                     | 0.092                                   |
| S0  | 128.84                        | 26.29                        | 0.025                                      | 0.755                    | 0.0030                     | 0.083                                   |

161 **Table S2.** Assignment of bands in FTIR spectrum of the bamboo fiber and bamboo bio-composite  
 162 [39].

| Compounds detected                                                               | Wavenumbers (cm <sup>-1</sup> ) |
|----------------------------------------------------------------------------------|---------------------------------|
| O–H stretching vibration of aromatic and aliphatic groups                        | 3389                            |
| C–H stretching vibration of CH <sub>3</sub> , –CH <sub>2</sub> – and –CH– groups | 2902                            |
| C=O stretching vibration of aldehydes, ketones, carboxylic acids, esters         | 1730                            |
| C=C stretching vibration of alkanes                                              | 1612                            |
| C–H stretching vibration of alkanes                                              | 1444                            |
| C–N stretching vibration of amines and amides                                    | 1242                            |
| C–O stretching vibration of aldehydes, ketones, carboxylic acids and esters      | 1034                            |
| C–I stretching vibration of aliphatic iodo compounds                             | 553                             |

164 **Table S3.** Distribution of bamboo resources in the world.

| <b>(Bamboo industry)</b>   | <b>(Area)<br/>Khm<sup>2</sup></b> | <b>Eco-economic benefits<br/>(million USD)</b> | <b>Wood-Based Panels<br/>(million m<sup>3</sup>)</b> |
|----------------------------|-----------------------------------|------------------------------------------------|------------------------------------------------------|
| <b>Asia Pacific Region</b> | 11000 [40,41]                     | 37378.15                                       | 320                                                  |
| <b>American region</b>     | 10200 [40,41]                     | 34659.74                                       | 47.715                                               |
| <b>African region</b>      | 1500 [40,41]                      | 5097.02                                        | 3.469                                                |
| <b>European region</b>     | No or little natural bamboo       | N/A                                            | 85.822                                               |

165 **Note:** Calculation basis of ecological and economic benefits [5-9]: CO<sub>2</sub> absorption about 170.91 T/ hm<sup>2</sup>, 12.36  
166 USD/ T; O<sub>2</sub> release: about 12 T/ hm<sup>2</sup>, 57.14 USD/ T; reduce soil erosion: 30 t/ hm<sup>2</sup>, 1.14 USD/ T; SO<sub>2</sub>  
167 absorption: About 9.9 T/ hm<sup>2</sup>, 57.14 USD/ T. Ecological and economic benefits of 1 hm<sup>2</sup> bamboo = 3398.014  
168 USD. Wood-Based Panels such as plywood, medium density fiberboard (MDF) and particleboard and the  
169 resins used like urea-formaldehyde (UF), melamine-modified urea formaldehyde (MUF), and phenol-  
170 formaldehyde(PF) are the main sources for FE. The present importance of such problematic results arises from  
171 the fact that formaldehyde was the first among the six chemical substances considered as industrial hazards  
172 (Tanabe,2008). In 2001, the CARB initiated the development of a regulation to reduce public exposure to  
173 formaldehyde. The CARB regulation, effective January 1, 2009, placed limits on formaldehyde emission (FE)  
174 from wood-based panels.

175 **Table S4.** Wood-Based Panels made by wood, bamboo, straw, branch and other wooden materials.

|                                                                                               | <b>Bonding<br/>strength<br/>(MPa)</b> | <b>Water<br/>resistance<br/>(%)</b> | <b>Formaldehyde<br/>Emission [47-53]</b> |
|-----------------------------------------------------------------------------------------------|---------------------------------------|-------------------------------------|------------------------------------------|
| bamboo bio-composite                                                                          | 4.1                                   | 2                                   | Near zero                                |
| fast-growing grass bio-composite                                                              | 1.6                                   | 6                                   | Near zero                                |
| poplar bio-composite                                                                          | 2                                     | 5                                   | Near zero                                |
| American National Standards Institute<br>(ANSI) A208.1-1999 Particleboard<br>[17]             | 0.6                                   | 8                                   | 17.0mg/ 100g (0.6 mg/L)                  |
| American National Standards Institute<br>(ANSI) A208.2-2002 Medium<br>Density Fiberboard [18] | 0.8                                   | 10                                  |                                          |
| China National Standard (CNS) GB/T<br>4897-2015 Particleboard [19]                            | 0.4                                   | 8                                   | 15.0mg/ 100g (1.5 mg/L)                  |
| China National Standard (CNS) GB/T<br>11718-2009 Medium Density<br>Fiberboard [20]            | 0.6                                   | 20                                  |                                          |

176
